# Supplementary material for: Diverse isostructural MOFs by postsynthetic metal node metathesis: anionic-to-cationic framework conversion, luminescence and separation of dyes
Source: Royal Society of Chemistry journal article supplement (doi:10.1039/c5ta04551g), 2015-01-01
Supplement: c5ta04551g1.pdf [file c5ta04551g1.pdf]

## ***ELECTRONIC SUPPORTING INFORMATION***

### **Diverse isostructural MOFs by postsynthetic metal node metathesis: anionic-to-cationic framework conversion, luminescence and separation of dyes**

Soana Seth, Govardhan Savitha and Jarugu NarasimhaMoorthy\*

Department of Chemistry, Indian Institute of Technology Kanpur, Kanpur 208016, INDIA

---

#### **Table of Contents**

|    |                                                                                          |      |
|----|------------------------------------------------------------------------------------------|------|
| 1  | General Aspects                                                                          | S-3  |
| 2  | X-ray crystal structure determinations                                                   | S-4  |
| 3  | Synthesis of the ligand <b>H<sub>4</sub>L</b>                                            | S-5  |
| 4  | Synthesis of the <b>Cd-MOFs</b>                                                          | S-6  |
| 4  | Procedure for PSME of the Cd-MOF                                                         | S-6  |
| 5  | Experiment for the reversibility of the PSME                                             | S-7  |
| 5  | M:Cd ratio of the MOFs after forward and reverse metal exchange experiments for 10 days. | S-7  |
| 5  | Overlay of the ligand dispositions and the networks of the Cd MOFs                       | S-8  |
| 6  | Similar modes of packing of the flexible 3,8-nets of <b>Cd-MOFs</b>                      | S-8  |
| 7  | Aangles between the twisted aromatic planes of <b>L</b> in <b>Cd-MOFs</b>                | S-9  |
| 8  | TGA profile of <b>Cd-MOF4</b>                                                            | S-9  |
| 9  | PXRD profiles of the <b>Cd-MOFs</b> and <b>Ln@MOFs</b>                                   | S-10 |
| 10 | PXRD profiles of the <b>Mm@MOFs</b> and <b>Tm@MOFs</b>                                   | S-10 |
| 11 | PXRD profiles of the <b>Cd-MOF</b> and <b>Eu@ MOF</b> after dye adsorption studies       | S-11 |

|    |                                                                                                                                         |      |
|----|-----------------------------------------------------------------------------------------------------------------------------------------|------|
| 12 | Solid state emission properties of <b>H<sub>4</sub>L</b> , <b>Cd-MOF</b> and <b>Mm@MOFs</b>                                             | S-11 |
| 13 | Adsorption studies of TT with the <b>Cd-MOF</b>                                                                                         | S-12 |
| 14 | Adsorption and release studies of Rh-6G with the <b>Cd-MOF</b>                                                                          | S-12 |
| 15 | Release experiment of MB and TT from the <b>Cd-MOF</b>                                                                                  | S-12 |
| 16 | Adsorption and release studies of NB with the <b>Cd-MOF</b> as monitored by UV-vis spectroscopy                                         | S-13 |
| 17 | Adsorption and release studies of NB with the <b>Cd-MOF</b> as monitored by fluorescence spectroscopy                                   | S-13 |
| 18 | Release experiment of BB from the <b>Eu@MOF</b>                                                                                         | S-13 |
| 19 | Crystallographic data of of <b>Cd-MOF1</b> , <b>Cd-MOF2</b> , <b>Cd-MOF4</b> and <b>Cd-MOF8</b>                                         | S-14 |
| 20 | Crystallographic data of of <b>Cd-MOF12</b> , <b>Ca@MOF</b> , <b>La@MOF</b> and <b>Pr@MOF</b>                                           | S-15 |
| 21 | Crystallographic data of of <b>Nd@MOF</b> , <b>Sm@MOF</b> , <b>Eu@MOF</b> and <b>Tb@MOF</b>                                             | S-16 |
| 22 | Crystallographic data of of <b>Mn@MOF</b> , <b>Co@MOF</b> , <b>Cu@MOF</b> and <b>Zn@MOF8</b>                                            | S-17 |
| 23 | <sup>1</sup> H NMR spectrum of 2-iodo-1,3-dimethoxybenzene                                                                              | S-18 |
| 24 | <sup>1</sup> H spectrum of 2,2',6,6'-tetramethoxybiphenyl                                                                               | S-19 |
| 25 | <sup>1</sup> H spectrum of 3,3'-diiodo-2,2',6,6'-tetramethoxybiphenyl                                                                   | S-20 |
| 26 | <sup>1</sup> H and <sup>13</sup> C NMR and spectra of 3,3',5,5'-tetrakis( <i>p</i> -methylphenyl)-2,2',6,6'-tetramethoxy-1,1'-biphenyl  | S-21 |
| 27 | <sup>1</sup> H and <sup>13</sup> C NMR and spectra of 3,3',5,5'-tetrakis( <i>p</i> -carboxyphenyl)-2,2',6,6'-tetramethoxy-1,1'-biphenyl | S-22 |

---

## General Aspects

$^1\text{H}$  NMR spectra were recorded on JEOL-Lambda (400 MHz and 500 MHz) spectrometers with deuterated chloroform or DMSO as an internal standard.  $^{13}\text{C}$  NMR spectra were recorded with 125 MHz NMR spectrometer with complete proton decoupling. IR spectra were recorded with a Bruker Vector 22 FT-IR spectrophotometer. Mass spectral analyses were carried out with Waters ESI-Q<sup>TOF</sup> Instrument. The melting points were determined with a JSGW melting point apparatus. Column chromatography was conducted with silica-gel 100-200  $\mu$  mesh (Souvenir Chemicals, India). All the solvents were freshly distilled prior to use. All metal salts, dyes and DMF (*N,N*-dimethylformamide) were obtained from Sigma-Aldrich and Alfa Aesar, and were used as received. The single crystal X-ray diffraction data were collected on a Bruker SMART/CCD diffractometer using MoK $\alpha$  radiation. Powder X-ray diffraction measurements were recorded on a Rigaku X-ray diffractometer. Thermal analyses ( $\text{N}_2$  atmosphere, heating rate of 10  $^\circ\text{C}/\text{min}$ ) were carried out in a Mettler Toledo TGA equipment. Energy dispersive X-ray spectroscopy (EDX) was carried out with a JEOL-7500F Microscope equipped with an energy-dispersive spectroscopy (EDS) instrument. ICP-AES analyses were performed with ICP-9000(N+M) (USA Thermo Jarrell-Ash Corp).

## **X-Ray Crystal Structure Determinations**

A good quality crystal in the case was chosen, mounted on a glass capillary, and the intensity data was collected at 100 K on a Bruker Nonius SMART APEX CCD detector system with Mo-sealed Siemens ceramic diffraction tube ( $\lambda = 0.71073$ ) and a highly oriented graphite monochromator operating at 50 kV and 30 mA. The data were collected on a hemisphere mode and processed with Bruker SAINTPLUS. Empirical absorption correction was made using Bruker SADABS. The structures were solved by Direct Methods using SHELXTL package and refined by full matrix least squares method based on  $F^2$  using SHELX97 program. All the non-hydrogen atoms were refined anisotropically. The hydrogen atoms were fixed in their ideal positions, assigned fixed isotropic U values and allowed to ride with their respective non-hydrogen atoms. The details of crystal data, structure solution and refinement are presented in Tables S3 to S6.

## Synthesis of the Tetraacid Ligand H<sub>4</sub>L.

### Synthesis of 3,3',5,5'-Tetrakis(*p*-methylphenyl)-2,2',6,6'-tetramethoxy-1,1'-biphenyl. A two-

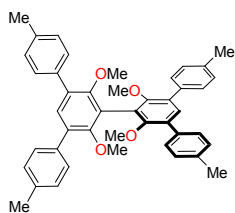

necked RB flask was charged with dioxane (15 mL) and water (15 mL), and the mixture was degassed and bubbled with N<sub>2</sub> for 15 min.

Subsequently, 3,3',5,5'-tetraiodo-2,2',6,6'-tetramethoxy-1,1'-biphenyl (2.0 g; 2.56 mmol), *p*-methylphenylboronic acid (13.4 g; 25.68 mmol) and NaOH (1.0 g; 25.68 mmol) were added to the round bottom flask followed by addition of the catalyst Pd(PPh<sub>3</sub>)<sub>4</sub> (0.2 g; 0.24 mmol). The entire mixture was heated at reflux for 2 d. At the end of this period, dioxane was removed in vacuo and the residue was extracted with chloroform for two times. The combined organic extract was dried with anhydrous Na<sub>2</sub>SO<sub>4</sub> and the solvent was removed in vacuo to obtain the crude product, which was purified by column chromatography to obtain 1.4 g (88%) of the product, mp 230-232 °C; IR (solid) cm<sup>-1</sup> 3431, 2938, 1462, 1060; <sup>1</sup>H NMR (CDCl<sub>3</sub>, 500 MHz) δ 2.40 (s, 12H), 3.39 (s, 12H), 7.22 (d, *J* = 7.8 Hz, 8H), 7.38 (s, 2H), 7.52 (d, *J* = 7.8 Hz, 8H); <sup>13</sup>C NMR (CDCl<sub>3</sub>, 125 MHz) δ 21.2, 60.3, 124.1, 128.9, 129.0, 130.2, 132.3, 135.8, 136.5, 155.4; ESI-MS<sup>+</sup> *m/z* Calcd for C<sub>44</sub>H<sub>42</sub>O<sub>4</sub>Na 657.2980 [M + Na]<sup>+</sup>, found 657.2986.

### Synthesis of 3,3',5,5'-Tetrakis(*p*-carboxyphenyl)-2,2',6,6'-tetramethoxy-1,1'-biphenyl, H<sub>4</sub>L.

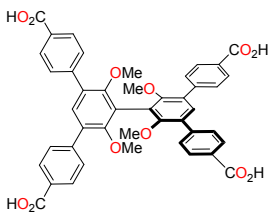

3,3',5,5'-Tetrakis(*p*-tolyl)-2,2',6,6'-tetramethoxy-1,1'-biphenyl (1.0 g; 1.58 mmol) was taken in a mixture of pyridine (32 mL) and H<sub>2</sub>O (8 mL). KMnO<sub>4</sub> (2.50 g; 15.8 mmol) was added to the reaction and heated at reflux for 6 days. KMnO<sub>4</sub> was added in increments at regular intervals of time and the reaction was monitored by TLC analysis. After completion of the reaction as judged from TLC analysis, pyridine was removed in vacuo, the brown solid was filtered off and washed with water. The filtrate was acidified with conc. HCl, and the resulting precipitate was collected by filtration to

afford 0.80 g (67%) of the final tetracarboxylic acid, mp (decomp) 272-274 °C; IR (solid)  $\text{cm}^{-1}$  3414, 2943, 2662, 1687;  $^1\text{H}$  NMR ( $\text{CD}_3\text{OD}$ , 500 MHz)  $\delta$  3.40 (s, 12H), 7.52 (s, 2H), 7.75 (d,  $J$  = 8.5 Hz, 8H), 8.11 (d,  $J$  = 8.5 Hz, 8H);  $^{13}\text{C}$  NMR ( $(\text{CD}_3)_2\text{SO}$ , 125 MHz)  $\delta$  60.5, 123.9, 128.9, 129.3, 129.6, 142.1, 155.9, 167.2; ESI-MS  $m/z$  Calcd for  $\text{C}_{44}\text{H}_{33}\text{O}_{12}$  753.1972  $[\text{M}-\text{H}]^-$ , found 753.1974.

### Synthesis of Cd-MOFs

**Synthesis of Cd-MOF4.** The tetraacid ligand **H<sub>4</sub>L** (0.01 g, 0.013 mmol) and  $\text{Cd}(\text{NO}_3)_2$  (0.013 g, 0.053 mmol) were dissolved in 1.5 mL of DMF taken in a 5 mL culture tube. The solution was heated for 48 h in a sand-bath placed in an oven maintained at 90 °C. After this period, the temperature was allowed to slowly attain to room temperature. Colourless block-shaped crystals were isolated by filtration, washed thoroughly with DMF and allowed to air dry. (11.6 mg, 47.4%).

**Cd-MOF1, Cd-MOF2, Cd-MOF8 and Cd-MOF12** were synthesized by following the same procedure used for the synthesis of **Cd-MOF4**, but by varying the ligand, i.e.,  $\text{Cd}(\text{NO}_3)_2$ , mole ratio. Accordingly, **H<sub>4</sub>L** and  $\text{Cd}(\text{NO}_3)_2$  were employed in 1:1, 1:2, 1:8 and 1:12 ratios.

**Typical procedure of metal exchange.** The crystals of the **Cd-MOF1** (ca. 10.0 mg) were suspended in 1 mL 0.01 M solutions of different metal salts in DMF. The mother liquor in each case was replenished by a fresh solution of the metal salt every 3 days once. After 15-20 days, the crystals were filtered and washed thoroughly with DMF to remove the organic and inorganic materials adsorbed at the surface. Finally, the metal-organic materials were allowed to dry. The material thus derived was examined by ICP-AES and EDX to determine the magnitude of metal exchange in each case.

## Reversibility of PSME

The reversibility of PSME was investigated for one metal ion of each of lanthanides, transition metal ions and main group metal ions; specifically, the cases for which the exchange was found to be more than 90% after soaking the crystals for 25 days were chosen for these investigations. Typically, ca. 20 mg **Cd-MOF** was soaked in 1mL each of 0.01 M solution of Tb(NO<sub>3</sub>)<sub>3</sub>, SrCl<sub>2</sub> and ZnCl<sub>2</sub> in DMF. The solutions were replenished by respective fresh solutions every two days. After 10 days, half of the crystals in each case were taken out, washed several times for getting rid of the excess metal ions and allowed to dry prior to ICP-AES analyses. The other parts of the crystals were subjected to the reverse exchange with 0.01 M Cd(NO<sub>3</sub>)<sub>2</sub> solution in the same manner for 10 days. The ratios of the metal ions as determined from the ICP-AES analyses are collated in Table S2. The reversibility of the process in all cases and the high propensity for the exchanged metal ions to be substituted again by Cd(II) ions clearly indicates that the **Cd-MOF** is highly robust and that the exchange of the framework metal ions occurs mostly due to the flexibility of the framework as well as concentration gradient.

**Table S1.** M:Cd atomic ratio of the MOFs after forward and reverse metal exchange for 10 days.

| Code           | M/Cd atomic ratio<br>(ICP-AES) |
|----------------|--------------------------------|
| Tb@MOF forward | 39.6: 60.4                     |
| Tb@MOF reverse | 4.5: 95.5                      |
| Sr@MOF forward | 99.8 : 0.2                     |
| Sr@MOF reverse | 0.08: 99.02                    |
| Zn@MOF forward | 56.4: 43.6                     |
| Zn@MOF reverse | 5.6: 94.4                      |

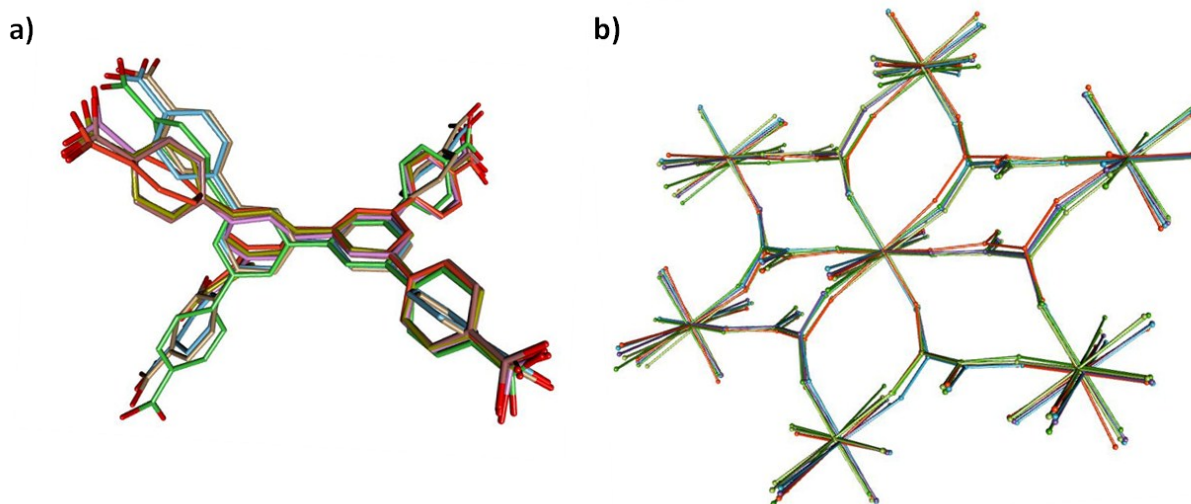

**Figure S1.** An overlay of (a) the structures of ligand **L** and (b) framework structures (as a 3,8-connecting net) observed in the five Cd-MOFs, viz., **Cd-MOF-1**, **Cd-MOF-2**, **Cd-MOF-4**, **Cd-MOF-8**, and **Cd-MOF-12**.

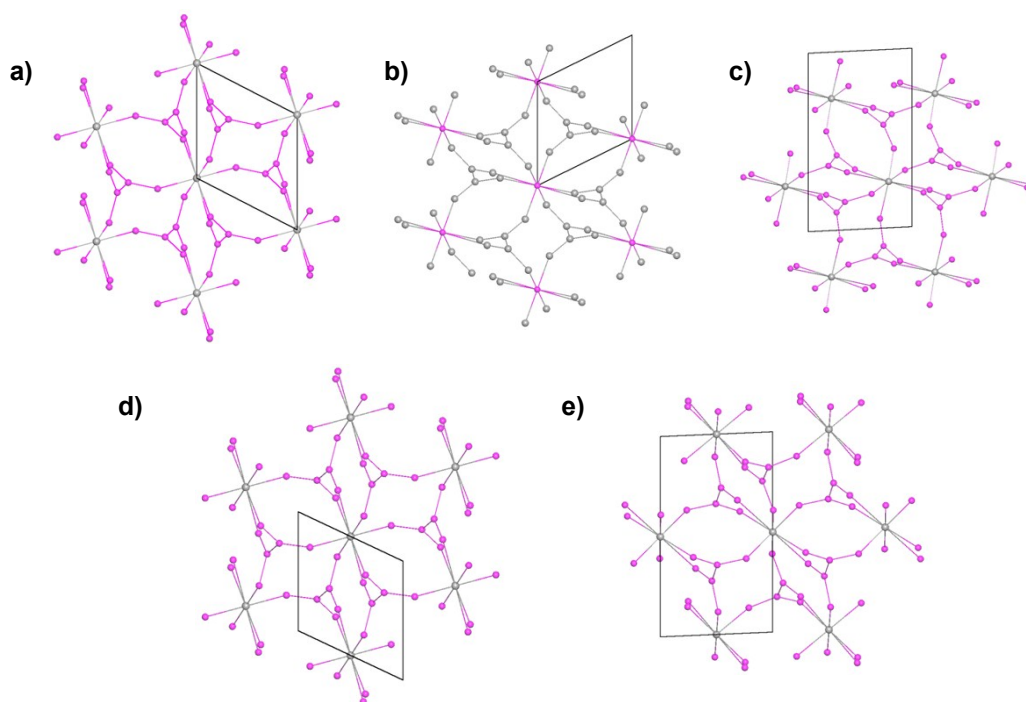

**Figure S2.** The crystal packing diagrams of all Cd-MOFs, i.e., **Cd-MOF-1**, **Cd-MOF-2**, **Cd-MOF-4**, **Cd-MOF-8**, and **Cd-MOF-12**, by reducing the ligand to a pair of 3-connecting module (a-e). Note that the coordination mode and basic organization are similar in each case. Cell parameters are defined differently for each of them due to small changes in the overall structure.



**Table S2.** Torsional angles between the dimethoxyaryl rings ( $\varphi$ ), and the phenylcarboxylate rings and the dimethoxyaryl rings of  $L^{4-}$  in the Cd-MOFs.

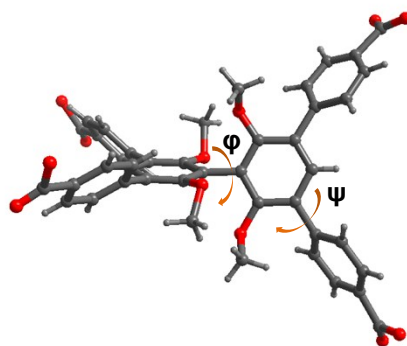

| Cd-MOF          | $\varphi$         | $\psi$                                                            | Cell volume ( $\text{\AA}^3$ ) |
|-----------------|-------------------|-------------------------------------------------------------------|--------------------------------|
| <b>Cd-MOF1</b>  | 72.032            | 43.128, 49.53, 49.194, 82.854                                     | 3731.08                        |
| <b>Cd-MOF2</b>  | 63.559            | 44.26, 49.363, 60.982, 49.076                                     | 3483.56                        |
| <b>Cd-MOF4</b>  | 70.601,<br>65.453 | 63.099, 50.701, 45.386, 45.722;<br>57.84, 55.565, 42.775, 51.803  | 7465.95                        |
| <b>Cd-MOF8</b>  | 72.613            | 47.334, 46.250, 48.803, 71.273                                    | 3844.03                        |
| <b>Cd-MOF12</b> | 73.330,<br>71.752 | 50.792, 57.535, 48.777, 49.024;<br>52.197, 55.392, 43.503, 49.179 | 7588.83                        |

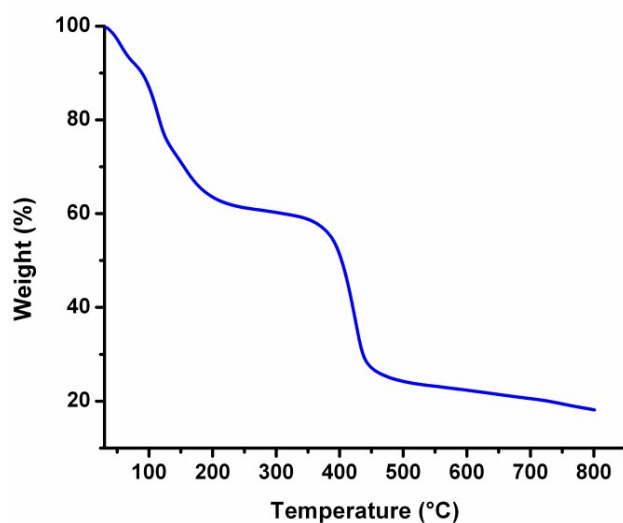

**Figure S3.** TGA profile of Cd-MOF4. The sample was heated from 30 °C to 800 °C at a heating rate of 10 °C/min.

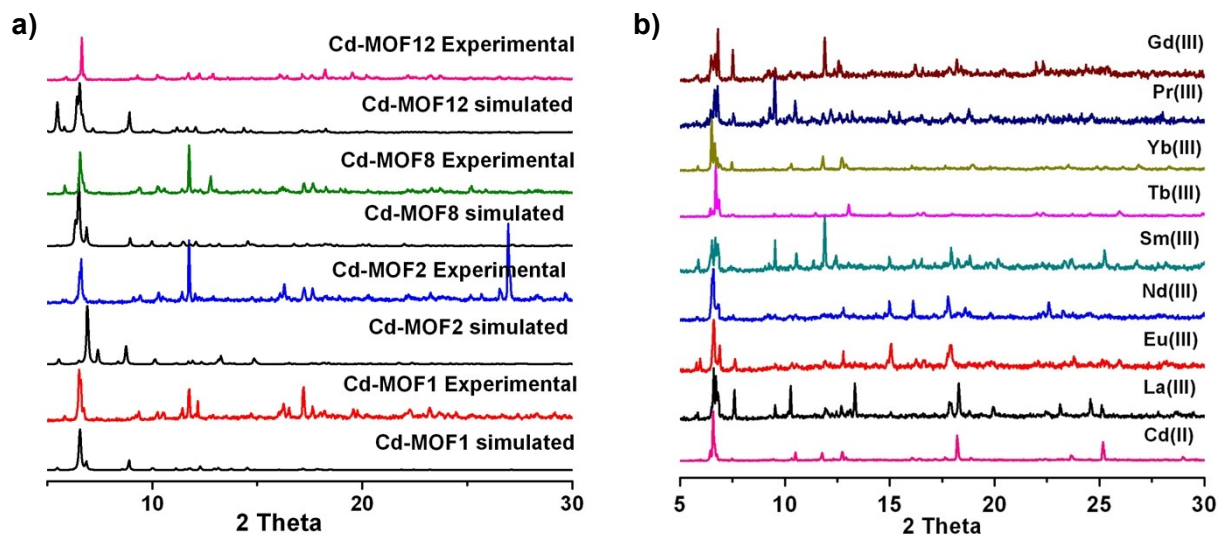

**Figure S4.** (a) PXRD profiles of **Cd-MOF1**, **Cd-MOF2**, **Cd-MOF8** and **Cd-MOF12** with their theoretically simulated profiles based on their single crystal structures. (b) PXRD profiles **Ln@MOFs** compared with the PXRD of as synthesized **Cd-MOF**.

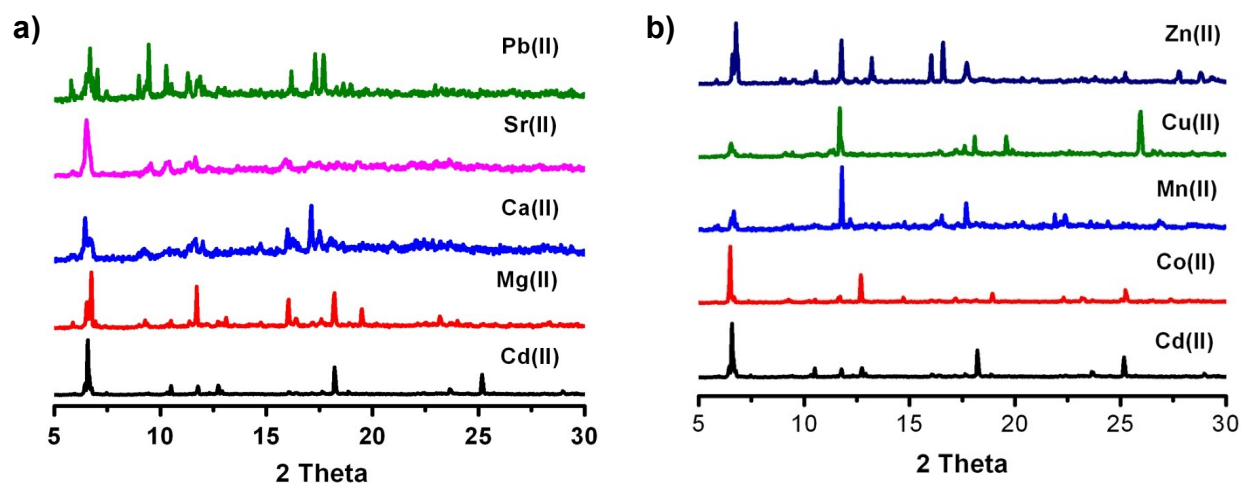

**Figure S5.** PXRD profiles of the (a) **Mm@MOFs** (main group metal ions) and (b) **Tm@MOFs** (transition metal ions) as compared to that of the parent **Cd-MOF**.

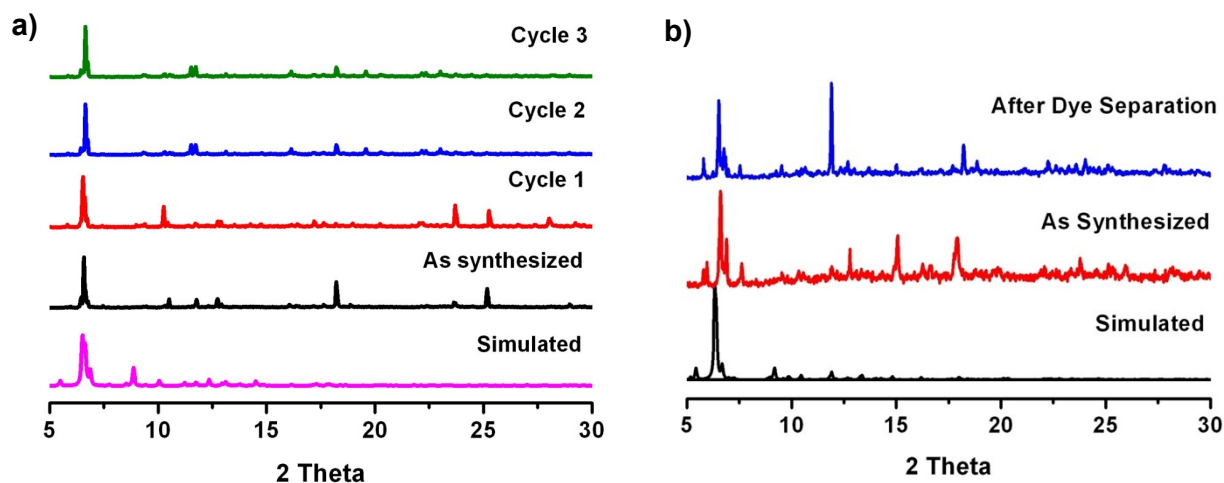

**Figure S6.** (a) PXRD profiles of as-synthesized **Cd-MOF4**, after 1st, 2nd and 3rd cycles of dye adsorption study and their comparison with the simulated pattern obtained from single crystal structure determination. (b) PXRD of **Eu@MOF** after the dye adsorption study as compared to that of the as-synthesized **Eu@MOF** and the simulated profile from the single crystal structure.

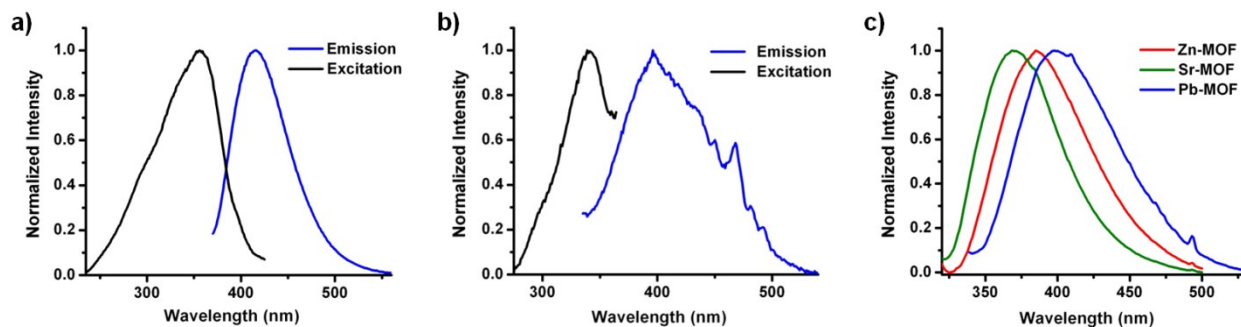

**Figure S7.** (a) Excitation and emission spectra of (a) the tetraacid ligand **H<sub>4</sub>L** in the solid state and (b) the parent **Cd-MOF**. (c) Emission spectra of **Zn-MOF**, **Sr-MOF** and **Pb-MOF**, accessed by PSME of **Cd-MOF** ( $\lambda_{\text{ex}} = 300$  nm.).

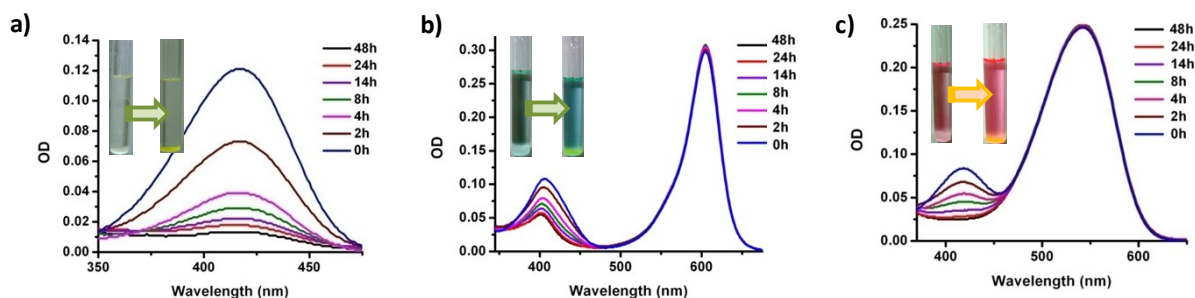

**Figure S8.** Adsorption (a) of the cationic dye TT in DMF with the anionic **Cd-MOF** as monitored by UV-vis spectroscopy, selective adsorption of TT by the **Cd-MOF** in the presence of negative dye XyCy (b) and neutral dye NR (c).

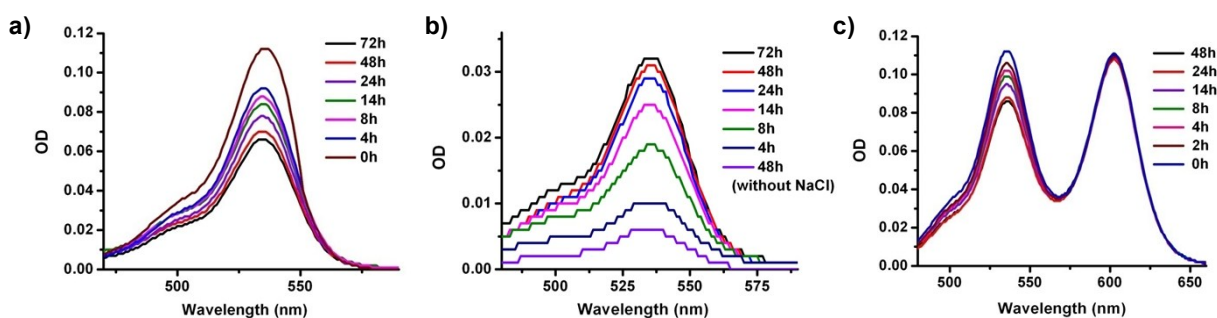

**Figure S9.** Adsorption (a) and subsequent release—upon treatment with saturated solution of NaCl—of the cationic dye Rhodamine-6G (Rh-6G) in DMF with the anionic **Cd-MOF** as monitored by UV-vis spectroscopy (b). (c) Competitive adsorption of Rh-6G by **Cd-MOF** in the presence of an anionic dye, namely, bromophenol blue.

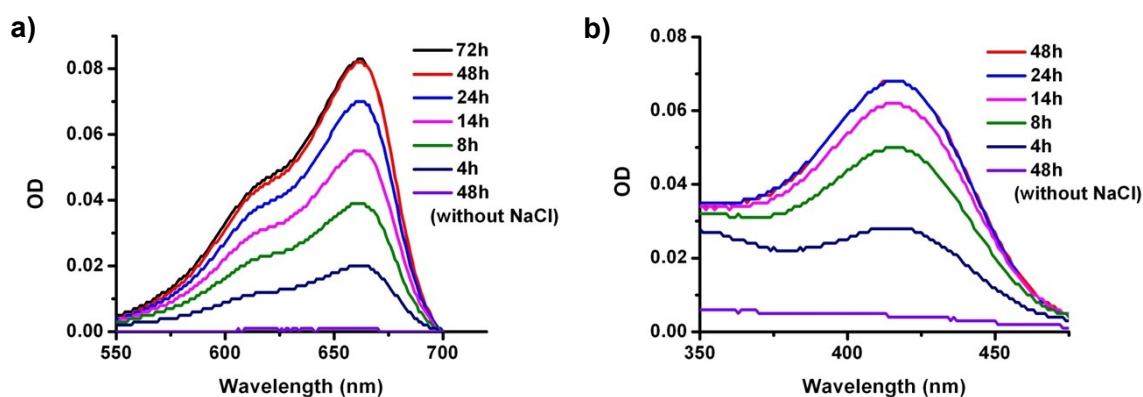

**Figure S10.** Reversion of dye adsorption: (a) MB and (b) TT from the **Cd-MOF** upon treatment with a saturated solution of NaCl in DMF, as monitored by UV-vis spectroscopy.

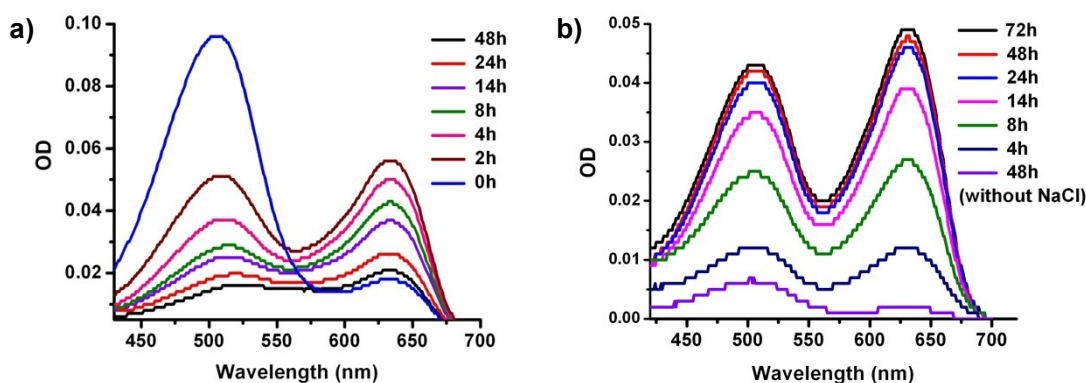

**Figure S11.** Adsorption of the cationic dye Nile blue by **Cd-MOF** (a), and subsequent release upon treatment with saturated solution of NaCl in DMF, as monitored by UV-vis spectroscopy (b).

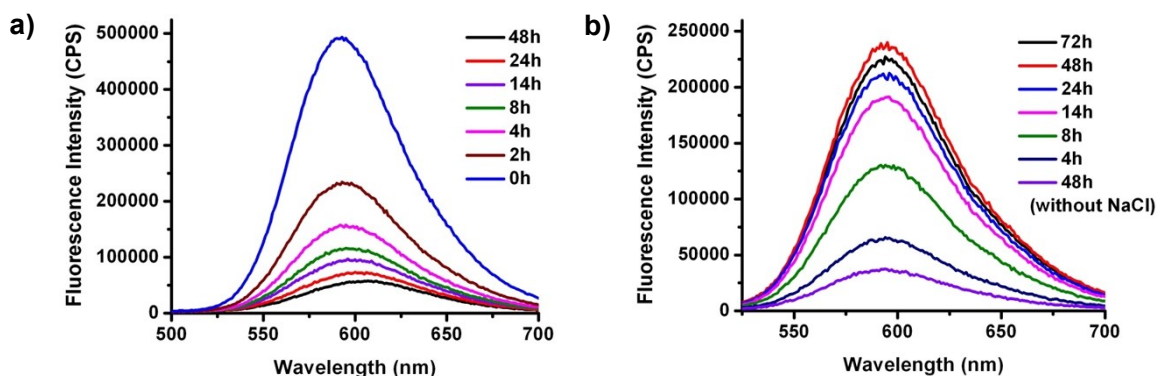

**Figure S12.** Adsorption of the cationic dye NB with **Cd-MOF** (a), and (b) its subsequent release upon treatment with saturated solution of NaCl in DMF, as monitored by change in the fluorescence intensity of the supernatant solution with time (b).

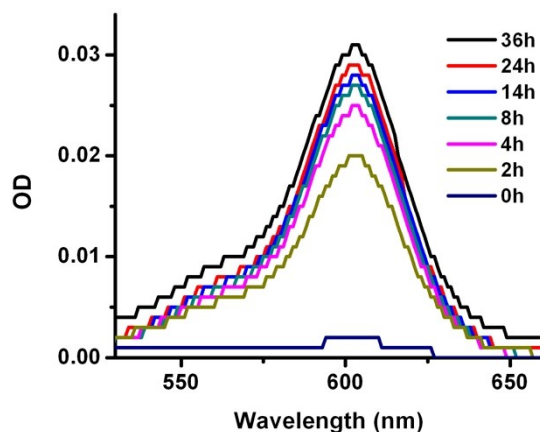

**Figure S13.** Release experiment of BB from the **Eu@MOF**, as monitored by UV-vis spectroscopy.

**Table S3.** Crystallographic parameters for **Cd-MOF1**, **Cd-MOF2**, **Cd-MOF4** and **Cd-MOF8**.

| MOF                                                    | Cd-MOF1                                                                                                        | Cd-MOF2                                                                                                     | Cd-MOF4                                                                                                       | Cd-MOF8                                                                                                          |
|--------------------------------------------------------|----------------------------------------------------------------------------------------------------------------|-------------------------------------------------------------------------------------------------------------|---------------------------------------------------------------------------------------------------------------|------------------------------------------------------------------------------------------------------------------|
| Empirical formula                                      | C <sub>88</sub> H <sub>60</sub> O <sub>24</sub> Cd <sub>3</sub>                                                | C <sub>88</sub> H <sub>60</sub> Cd <sub>3</sub> O <sub>24</sub>                                             | C <sub>88</sub> H <sub>60</sub> O <sub>24</sub> Cd <sub>3</sub>                                               | C <sub>112</sub> H <sub>116</sub> N <sub>8</sub> O <sub>34</sub> Cd <sub>4</sub>                                 |
| Formula weight                                         | 1838.59                                                                                                        | 1838.59                                                                                                     | 1838.56                                                                                                       | 2567.72                                                                                                          |
| Temperature (K)                                        | 100(2) K                                                                                                       | 100(2) K                                                                                                    | 100(2) K                                                                                                      | 100(2) K                                                                                                         |
| Wavelength (Å)                                         | 0.71073 Å                                                                                                      | 0.71073 Å                                                                                                   | 0.71073 Å                                                                                                     | 0.71073 Å                                                                                                        |
| Crystal system                                         | Triclinic                                                                                                      | Triclinic                                                                                                   | Triclinic                                                                                                     | Triclinic                                                                                                        |
| Space group                                            | P -1                                                                                                           | P -1                                                                                                        | P -1                                                                                                          | P -1                                                                                                             |
| Unit cell dimensions                                   | a = 15.462(5) Å<br>b = 16.063(5) Å<br>c = 18.103(5) Å<br>α = 107.120(5)°<br>β = 102.556(5)°<br>γ = 111.229(5)° | a = 15.277(2) Å<br>b = 16.131(2) Å<br>c = 17.297(3) Å<br>α = 67.016(3)°<br>β = 81.847(3)°<br>γ = 62.703(2)° | a = 16.1904(18) Å<br>b = 18.127(2) Å<br>c = 27.495(3) Å<br>α = 75.967(2)°<br>β = 88.446(2)°<br>γ = 72.710(2)° | a = 15.4562(18) Å<br>b = 16.278(2) Å<br>c = 18.346(2) Å<br>α = 108.559(2)°<br>β = 103.799(2)°<br>γ = 108.453(2)° |
| Volume (Å <sup>3</sup> )                               | 3731                                                                                                           | 3483.6(9)                                                                                                   | 7466.0(14)                                                                                                    | 3844.0(8)                                                                                                        |
| Z, Calculated density(g/cm <sup>3</sup> )              | 1, 0.865                                                                                                       | 1, 0.876                                                                                                    | 2, 0.818                                                                                                      | 1, 1.109                                                                                                         |
| Absorption coefficient(mm <sup>-1</sup> )              | 0.604                                                                                                          | 0.499                                                                                                       | 0.465                                                                                                         | 0.607                                                                                                            |
| <i>F</i> (000)                                         | 964                                                                                                            | 924                                                                                                         | 1848                                                                                                          | 1308                                                                                                             |
| θ range for data collection (°)                        | 2.291 to 28.399°                                                                                               | 1.280 to 28.387°                                                                                            | 0.764 to 28.348°                                                                                              | 1.264 to 28.306°                                                                                                 |
| Limiting indices                                       | -20 ≤ h ≤ 20<br>-21 ≤ k ≤ 15<br>-23 ≤ l ≤ 24                                                                   | -20 ≤ h ≤ 13<br>-21 ≤ k ≤ 16<br>-22 ≤ l ≤ 14                                                                | -21 ≤ h ≤ 21<br>-23 ≤ k ≤ 23<br>-19 ≤ l ≤ 35                                                                  | -9 ≤ h ≤ 19<br>-20 ≤ k ≤ 19<br>-24 ≤ l ≤ 24                                                                      |
| Reflections collected                                  | 28367                                                                                                          | 21432                                                                                                       | 47079                                                                                                         | 23842                                                                                                            |
| Independent reflections                                | 17923<br>[R(int) = 0.0672]                                                                                     | 15202<br>[R(int) = 0.0368]                                                                                  | 32975<br>[R(int) = 0.0628]                                                                                    | 16857<br>[R(int) = 0.0338]                                                                                       |
| Completeness to θ                                      | 97.2 %                                                                                                         | 97.8 %                                                                                                      | 98.3 %                                                                                                        | 98.1 %                                                                                                           |
| Refinement method                                      | Full-matrix least-squares on F <sup>2</sup>                                                                    | Full-matrix least-squares on F <sup>2</sup>                                                                 | Full-matrix least-squares on F <sup>2</sup>                                                                   | Full-matrix least-squares on F <sup>2</sup>                                                                      |
| Data / restraints / parameters                         | 17923 / 0 / 366                                                                                                | 15202 / 0 / 470                                                                                             | 32975 / 0 / 976                                                                                               | 16857 / 9 / 572                                                                                                  |
| Goodness-of-fit on F <sup>2</sup>                      | 0.912                                                                                                          | 0.934                                                                                                       | 1.046                                                                                                         | 1.134                                                                                                            |
| Final <i>R</i> indices<br>[ <i>I</i> > 2σ( <i>I</i> )] | R1 = 0.1328<br>wR2 = 0.3375                                                                                    | R1 = 0.0724<br>wR2 = 0.1936                                                                                 | R1 = 0.1024<br>wR2 = 0.2452                                                                                   | R1 = 0.1026<br>wR2 = 0.2769                                                                                      |
| <i>R</i> indices (all data)                            | R1 = 0.1328<br>wR2 = 0.3375                                                                                    | R1 = 0.1198<br>wR2 = 0.2286                                                                                 | R1 = 0.1690<br>wR2 = 0.2718                                                                                   | R1 = 0.1407<br>wR2 = 0.3398                                                                                      |
| Largest diff. peak and hole (e.Å <sup>-3</sup> )       | 2.421 and -2.549                                                                                               | 1.155 and -2.372                                                                                            | 5.400 and -1.638                                                                                              | 3.684 and -3.796                                                                                                 |

**Table S4.** Crystallographic parameters for **Cd-MOF12**, **Ca@MOF**, **La@MOF** and **Pr@MOF**.

| MOF                                                    | Cd-MOF12                                                                                                       | Ca@MOF                                                                                                       | La@MOF                                                                                                        | Pr@MOF                                                                                                         |
|--------------------------------------------------------|----------------------------------------------------------------------------------------------------------------|--------------------------------------------------------------------------------------------------------------|---------------------------------------------------------------------------------------------------------------|----------------------------------------------------------------------------------------------------------------|
| Empirical formula                                      | C <sub>97</sub> H <sub>82</sub> N <sub>3</sub> O <sub>30</sub> Cd <sub>4</sub>                                 | C <sub>88</sub> H <sub>60</sub> O <sub>29</sub> Ca <sub>1.75</sub> C<br>d <sub>2.25</sub>                    | C <sub>91</sub> H <sub>67</sub> NO <sub>26</sub> Cd <sub>1.46</sub><br>La <sub>1.54</sub>                     | C <sub>97</sub> H <sub>81</sub> N <sub>3</sub> O <sub>27</sub> Cd <sub>1.43</sub><br>Pr <sub>1.57</sub>        |
| Formula weight                                         | 2219.3                                                                                                         | 1904.32                                                                                                      | 1968.53                                                                                                       | 2102.71                                                                                                        |
| Temperature (K)                                        | 100(2) K                                                                                                       | 100(2) K                                                                                                     | 100(2) K                                                                                                      | 100(2) K                                                                                                       |
| Wavelength (Å)                                         | 0.71073 Å                                                                                                      | 0.71073 Å                                                                                                    | 0.71073 Å                                                                                                     | 0.71073 Å                                                                                                      |
| Crystal system                                         | Triclinic                                                                                                      | Triclinic                                                                                                    | Triclinic                                                                                                     | Triclinic                                                                                                      |
| Space group                                            | P -1                                                                                                           | P -1                                                                                                         | P -1                                                                                                          | P -1                                                                                                           |
| Unit cell dimensions                                   | a = 15.6469(17) Å<br>b = 18.471(2) Å<br>c = 27.450(3) Å<br>α = 99.525(2)°<br>β = 90.063(2)°<br>γ = 103.876(2)° | a = 15.631(5) Å<br>b = 18.456(6) Å<br>c = 27.517(10) Å<br>α = 80.164(7)°<br>β = 89.994(7)°<br>γ = 76.264(6)° | a = 15.744(3) Å<br>b = 18.343(3) Å<br>c = 28.121(5) Å<br>α = 104.422(3)°<br>β = 92.252(3)°<br>γ = 108.122(3)° | a = 15.890(5) Å<br>b = 18.596(6) Å<br>c = 28.500(10) Å<br>α = 101.979(6)°<br>β = 94.414(6)°<br>γ = 108.931(5)° |
| Volume (Å <sup>3</sup> )                               | 7588.8(14)                                                                                                     | 7591(4)                                                                                                      | 7415(2)                                                                                                       | 7697(4)                                                                                                        |
| Z, Calculated density(g/cm <sup>3</sup> )              | 2, 0.966                                                                                                       | 2, 0.907                                                                                                     | 2, 0.899                                                                                                      | 8, 0.925                                                                                                       |
| Absorption coefficient(mm <sup>-1</sup> )              | 0.604                                                                                                          | 0.499                                                                                                        | 0.894                                                                                                         | 0.982                                                                                                          |
| <i>F</i> (000)                                         | 2222                                                                                                           | 2096                                                                                                         | 1996                                                                                                          | 2154                                                                                                           |
| θ range for data collection (°)                        | 0.753 to 28.367°                                                                                               | 1.154 to 28.401°                                                                                             | 0.754 to 28.325°                                                                                              | 1.194 to 28.297°                                                                                               |
| Limiting indices                                       | -20 ≤ h ≤ 20<br>-24 ≤ k ≤ 12<br>-33 ≤ l ≤ 35                                                                   | -20 ≤ h ≤ 19<br>-23 ≤ k ≤ 24<br>-35 ≤ l ≤ 30                                                                 | -19 ≤ h ≤ 20<br>-22 ≤ k ≤ 23<br>-25 ≤ l ≤ 37                                                                  | -20 ≤ h ≤ 13<br>-24 ≤ k ≤ 23<br>-33 ≤ l ≤ 37                                                                   |
| Reflections collected                                  | 47106                                                                                                          | 46096                                                                                                        | 44502                                                                                                         | 42687                                                                                                          |
| Independent reflections                                | 33384<br>[R(int) = 0.0582]                                                                                     | 33043<br>[R(int) = 0.0917]                                                                                   | 31902<br>[R(int) = 0.0427]                                                                                    | 32008<br>[R(int) = 0.0577]                                                                                     |
| Completeness to θ                                      | 97.9 %                                                                                                         | 97.7 %                                                                                                       | 97.6 %                                                                                                        | 95.8 %                                                                                                         |
| Refinement method                                      | Full-matrix least-squares on F <sup>2</sup>                                                                    | Full-matrix least-squares on F <sup>2</sup>                                                                  | Full-matrix least-squares on F <sup>2</sup>                                                                   | Full-matrix least-squares on F <sup>2</sup>                                                                    |
| Data / restraints / parameters                         | 33384 / 0 / 1105                                                                                               | 33043 / 0 / 1077                                                                                             | 31902 / 0 / 1016                                                                                              | 32008 / 0 / 835                                                                                                |
| Goodness-of-fit on F <sup>2</sup>                      | 0.949                                                                                                          | 0.803                                                                                                        | 0.981                                                                                                         | 0.932                                                                                                          |
| Final <i>R</i> indices<br>[ <i>I</i> > 2σ( <i>I</i> )] | R1 = 0.0903<br>wR2 = 0.2242                                                                                    | R1 = 0.1094<br>wR2 = 0.2623                                                                                  | R1 = 0.0823<br>wR2 = 0.2128                                                                                   | R1 = 0.1115<br>wR2 = 0.2906                                                                                    |
| <i>R</i> indices (all data)                            | R1 = 0.1528<br>wR2 = 0.2730                                                                                    | R1 = 0.2188<br>wR2 = 0.2992                                                                                  | R1 = 0.1254<br>wR2 = 0.2548                                                                                   | R1 = 0.1687<br>wR2 = 0.3365                                                                                    |
| Largest diff. peak and hole (e.Å <sup>-3</sup> )       | 3.268 and -2.815                                                                                               | 2.147 and -1.638                                                                                             | 1.749 and -2.213                                                                                              | 3.419 and -3.001                                                                                               |

**Table S5.** Crystallographic parameters for **Nd@MOF**, **Sm@MOF**, **Eu@MOF** and **Tb@MOF**.

| MOF                                              | Nd@MOF                                                                                                        | Sm@MOF                                                                                                        | Eu@MOF                                                                                                        | Tb@MOF                                                                                                         |
|--------------------------------------------------|---------------------------------------------------------------------------------------------------------------|---------------------------------------------------------------------------------------------------------------|---------------------------------------------------------------------------------------------------------------|----------------------------------------------------------------------------------------------------------------|
| Empirical formula                                | C <sub>97</sub> H <sub>81</sub> N <sub>3</sub> O <sub>28</sub> Cd <sub>1.33</sub> Nd <sub>1.67</sub>          | C <sub>104</sub> H <sub>104</sub> N <sub>6</sub> O <sub>29</sub> Cd <sub>1.72</sub> Sm <sub>1.28</sub>        | C <sub>97</sub> H <sub>81</sub> N <sub>3</sub> O <sub>27</sub> Cd <sub>1.68</sub> Eu <sub>1.32</sub>          | C <sub>88</sub> H <sub>60</sub> O <sub>26</sub> Tb <sub>3</sub>                                                |
| Formula weight                                   | 2127.13                                                                                                       | 2287.86                                                                                                       | 2110.18                                                                                                       | 2010.15                                                                                                        |
| Temperature (K)                                  | 100(2) K                                                                                                      | 100(2) K                                                                                                      | 100(2) K                                                                                                      | 100(2) K                                                                                                       |
| Wavelength (Å)                                   | 0.71073 Å                                                                                                     | 0.71073 Å                                                                                                     | 0.71073 Å                                                                                                     | 0.71073 Å                                                                                                      |
| Crystal system                                   | Triclinic                                                                                                     | Triclinic                                                                                                     | Triclinic                                                                                                     | Triclinic                                                                                                      |
| Space group                                      | P -1                                                                                                          | P -1                                                                                                          | P -1                                                                                                          | P -1                                                                                                           |
| Unit cell dimensions                             | a = 15.785(2) Å<br>b = 18.275(3) Å<br>c = 28.066(4) Å<br>α = 104.478(3)°<br>β = 92.048(3)°<br>γ = 107.860(3)° | a = 15.813(4) Å<br>b = 18.213(4) Å<br>c = 27.961(6) Å<br>α = 104.736(4)°<br>β = 91.538(4)°<br>γ = 107.955(4)° | a = 15.970(2) Å<br>b = 18.597(3) Å<br>c = 28.434(4) Å<br>α = 100.536(2)°<br>β = 95.130(2)°<br>γ = 109.615(2)° | a = 15.779(8) Å<br>b = 18.369(9) Å<br>c = 28.064(14) Å<br>α = 103.419(9)°<br>β = 91.978(7)°<br>γ = 108.705(8)° |
| Volume (Å <sup>3</sup> )                         | 7405.6(19)                                                                                                    | 7360(3)                                                                                                       | 7716.2(19)                                                                                                    | 7442(6)                                                                                                        |
| Z, Calculated density(g/cm <sup>3</sup> )        | 2, 0.969                                                                                                      | 2, 1.061                                                                                                      | 2, 0.936                                                                                                      | 2, 0.906                                                                                                       |
| Absorption coefficient(mm <sup>-1</sup> )        | 1.086                                                                                                         | 1.237                                                                                                         | 1.252                                                                                                         | 1.454                                                                                                          |
| <i>F</i> (000)                                   | 2158                                                                                                          | 2374                                                                                                          | 2174                                                                                                          | 2006                                                                                                           |
| θ range for data collection (°)                  | 0.755 to 28.331°                                                                                              | 0.758 to 28.373°                                                                                              | 2.04 to 21.20°                                                                                                | 1.211 to 28.296°                                                                                               |
| Limiting indices                                 | -18 ≤ h ≤ 20<br>-23 ≤ k ≤ 2<br>-36 ≤ l ≤ 26                                                                   | -21 ≤ h ≤ 9<br>-21 ≤ k ≤ 23<br>-37 ≤ l ≤ 35                                                                   | -16 ≤ h ≤ 16<br>-16 ≤ k ≤ 18<br>-28 ≤ l ≤ 28                                                                  | -19 ≤ h ≤ 20<br>-24 ≤ k ≤ 24<br>-20 ≤ l ≤ 37                                                                   |
| Reflections collected                            | 46281                                                                                                         | 44824                                                                                                         | 28723                                                                                                         | 43102                                                                                                          |
| Independent reflections                          | 32513<br>[R(int) = 0.0339]                                                                                    | 32018<br>[R(int) = 0.0462]                                                                                    | 16735<br>[R(int) = 0.0385]                                                                                    | 31641<br>[R(int) = 0.1972]                                                                                     |
| Completeness to θ                                | 98.0 %                                                                                                        | 97.8 %                                                                                                        | 98.2 %                                                                                                        |                                                                                                                |
| Refinement method                                | Full-matrix least-squares on F <sup>2</sup>                                                                    |
| Data / restraints / parameters                   | 32513 / 0 / 977                                                                                               | 32018 / 0 / 1175                                                                                              | 16735 / 0 / 1041                                                                                              | 31641 / 0 / 410                                                                                                |
| Goodness-of-fit on F <sup>2</sup>                | 1.168                                                                                                         | 1.025                                                                                                         | 1.091                                                                                                         | 1.014                                                                                                          |
| Final <i>R</i> indices                           | R1 = 0.1061                                                                                                   | R1 = 0.1014                                                                                                   | R1 = 0.0972                                                                                                   | R1 = 0.2057                                                                                                    |
| [ <i>I</i> > 2σ( <i>I</i> )]                     | wR2 = 0.2928                                                                                                  | wR2 = 0.2695                                                                                                  | wR2 = 0.2590                                                                                                  | wR2 = 0.4474                                                                                                   |
| <i>R</i> indices (all data)                      | R1 = 0.1427                                                                                                   | R1 = 0.1648                                                                                                   | R1 = 0.1123                                                                                                   | R1 = 0.4734                                                                                                    |
|                                                  | wR2 = 0.3546                                                                                                  | wR2 = 0.3159                                                                                                  | wR2 = 0.2695                                                                                                  | wR2 = 0.5884                                                                                                   |
| Largest diff. peak and hole (e.Å <sup>-3</sup> ) | 4.580 and -2.909                                                                                              | 2.313 and -2.489                                                                                              | 3.113 and -3.224                                                                                              | 2.663 and -0.936                                                                                               |



**Table S6.** Crystallographic parameters for **Mn@MOF**, **Co@MOF**, **Cu@MOF** and **Zn@MOF**.

| MOF                                                    | Mn@MOF                                                                                                          | Co@MOF                                                                                                   | Cu@MOF                                                                                                         | Zn@MOF                                                                                                         |
|--------------------------------------------------------|-----------------------------------------------------------------------------------------------------------------|----------------------------------------------------------------------------------------------------------|----------------------------------------------------------------------------------------------------------------|----------------------------------------------------------------------------------------------------------------|
| Empirical formula                                      | C <sub>44</sub> H <sub>30</sub> O <sub>12</sub> Mn <sub>0.63</sub><br>Cd <sub>0.87</sub>                        | C <sub>44</sub> H <sub>30</sub> O <sub>12</sub> Co <sub>1.21</sub><br>Cd <sub>0.29</sub>                 | C <sub>94</sub> H <sub>74</sub> N <sub>2</sub> O <sub>30</sub> Cu <sub>3.3</sub><br>Cd <sub>0.69</sub>         | C <sub>44</sub> H <sub>30</sub> O <sub>12</sub> Zn <sub>1.46</sub> Cd <sub>0.04</sub>                          |
| Formula weight                                         | 833.15                                                                                                          | 3749(2)                                                                                                  | 1999.37                                                                                                        | 850.74                                                                                                         |
| Temperature (K)                                        | 100(2) K                                                                                                        | 100(2) K                                                                                                 | 100(2) K                                                                                                       | 100(2) K                                                                                                       |
| Wavelength (Å)                                         | 0.71073 Å                                                                                                       | 0.71073 Å                                                                                                | 0.71073 Å                                                                                                      | 0.71073 Å                                                                                                      |
| Crystal system                                         | Triclinic                                                                                                       | Triclinic                                                                                                | Triclinic                                                                                                      | Triclinic                                                                                                      |
| Space group                                            | P -1                                                                                                            | P -1                                                                                                     | P -1                                                                                                           | P -1                                                                                                           |
| Unit cell dimensions                                   | a = 15.957(4) Å<br>b = 16.460(4) Å<br>c = 17.300(5) Å<br>α = 106.070(6)°<br>β = 100.850 (5)°<br>γ = 113.408(5)° | a = 15.468(5)<br>b = 15.785(5)<br>c = 18.038(6)<br>α = 107.270(6)°<br>β = 103.949(6)°<br>γ = 107.163(5)° | a = 15.508(3) Å<br>b = 16.241(3) Å<br>c = 18.383(4) Å<br>α = 108.709(4)°<br>β = 104.279(4)°<br>γ = 107.160(4)° | a = 15.116(5) Å<br>b = 15.393(5) Å<br>c = 18.225(6) Å<br>α = 105.732(6)°<br>β = 106.553(6)°<br>γ = 104.405(7)° |
| Volume (Å <sup>3</sup> )                               | 3770.9(17)                                                                                                      | 3749(2)                                                                                                  | 3880.8(13)                                                                                                     | 3660(2)                                                                                                        |
| Z, Calculated density(g/cm <sup>3</sup> )              | 2, 0.734                                                                                                        | 2, 0.743                                                                                                 | 1, 0.842                                                                                                       | 2, 0.770                                                                                                       |
| Absorption coefficient(mm <sup>-1</sup> )              | 0.289                                                                                                           | 0.370                                                                                                    | 0.589                                                                                                          | 0.530                                                                                                          |
| <i>F</i> (000)                                         | 855                                                                                                             | 861                                                                                                      | 1010                                                                                                           | 870                                                                                                            |
| θ range for data collection (°)                        | 1.464 to 28.249°                                                                                                | 1.471 to 28.159°                                                                                         | 1.450 to 28.240°                                                                                               | 1.254 to 28.371°                                                                                               |
| Limiting indices                                       | -18 ≤ h ≤ 20<br>-21 ≤ k ≤ 21<br>-22 ≤ l ≤ 15                                                                    | -14 ≤ h ≤ 20<br>-19 ≤ k ≤ 19<br>-23 ≤ l ≤ 14                                                             | -11 ≤ h ≤ 20<br>-21 ≤ k ≤ 20<br>-23 ≤ l ≤ 18                                                                   | -20 ≤ h ≤ 19<br>-8 ≤ k ≤ 20<br>-24 ≤ l ≤ 24                                                                    |
| Reflections collected                                  | 19658                                                                                                           | 19883                                                                                                    | 23659                                                                                                          | 22314                                                                                                          |
| Independent reflections                                | 14714<br>[R(int) = 0.1442]                                                                                      | 15439<br>[R(int) = 0.0577]                                                                               | 16824<br>[R(int) = 0.0397]                                                                                     | 16003<br>[R(int) = 0.0768]                                                                                     |
| Completeness to θ                                      | 91.4 %                                                                                                          | 95.8 %                                                                                                   | 97.6 %                                                                                                         |                                                                                                                |
| Refinement method                                      | Full-matrix least-squares on F <sup>2</sup>                                                                     | Full-matrix least-squares on F <sup>2</sup>                                                              | Full-matrix least-squares on F <sup>2</sup>                                                                    | Full-matrix least-squares on F <sup>2</sup>                                                                    |
| Data / restraints / parameters                         | 14714 / 0 / 231                                                                                                 | 15439 / 0 / 501                                                                                          | 16824 / 0 / 513                                                                                                | 16003 / 0 / 513                                                                                                |
| Goodness-of-fit on F <sup>2</sup>                      | 1.917                                                                                                           | 0.734                                                                                                    | 1.300                                                                                                          | 0.836                                                                                                          |
| Final <i>R</i> indices<br>[ <i>I</i> > 2σ( <i>I</i> )] | R1 = 0.4089<br>wR2 = 0.6100                                                                                     | R1 = 0.0933<br>wR2 = 0.2232                                                                              | R1 = 0.1456<br>wR2 = 0.3555                                                                                    | R1 = 0.1016<br>wR2 = 0.2376                                                                                    |
| <i>R</i> indices (all data)                            | R1 = 0.4768<br>wR2 = 0.6778                                                                                     | R1 = 0.1840<br>wR2 = 0.2603                                                                              | R1 = 0.1791<br>wR2 = 0.4066                                                                                    | R1 = 0.2061<br>wR2 = 0.2719                                                                                    |
| Largest diff. peak and hole (e.Å <sup>-3</sup> )       | 5.440 and -1.294                                                                                                | 0.682 and -0.941                                                                                         | 4.434 and -2.691                                                                                               | 0.727 and -1.297                                                                                               |

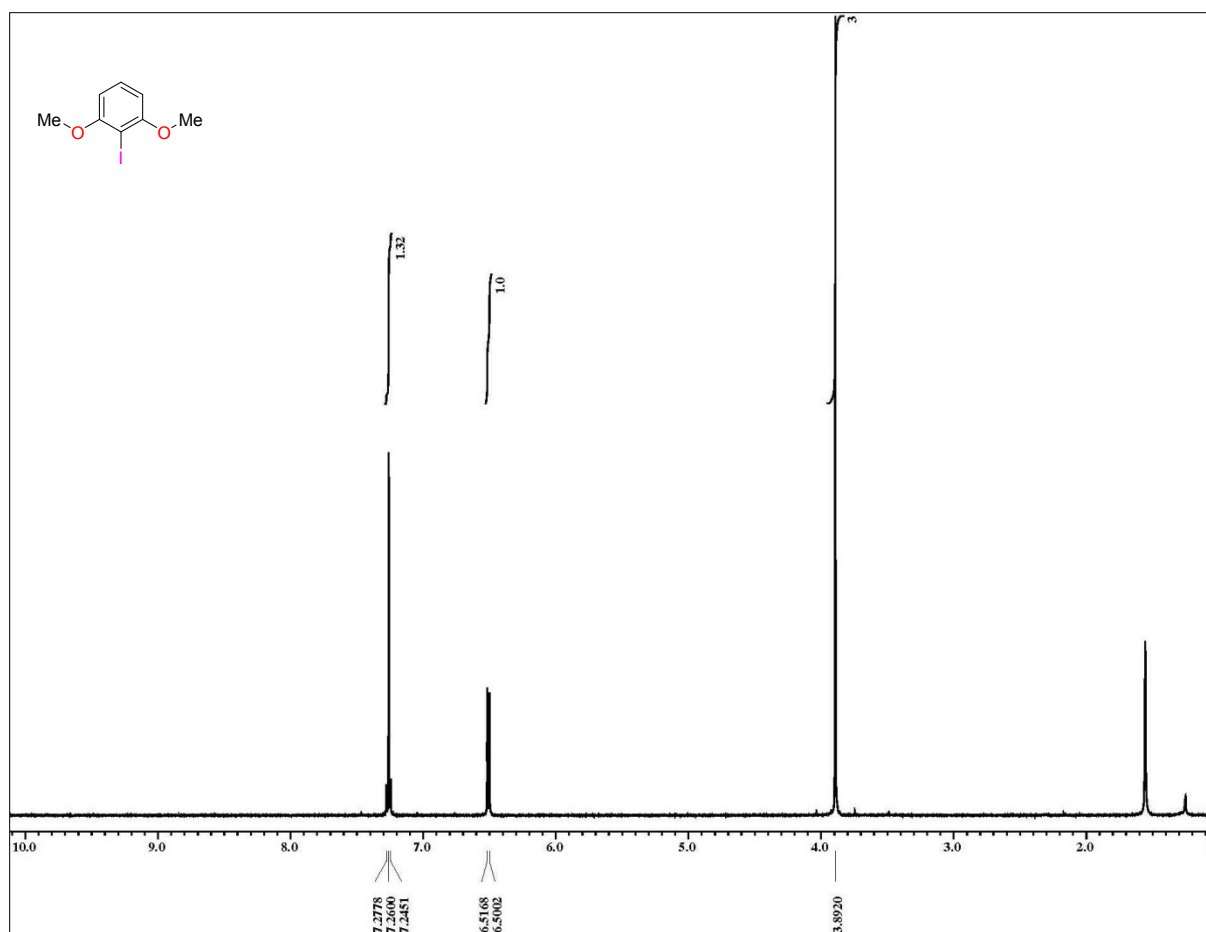

**Figure S14.**  $^1\text{H}$  NMR spectrum (500 MHz) of 2-iodo-1,3-dimethoxybenzene in  $\text{CDCl}_3$ .

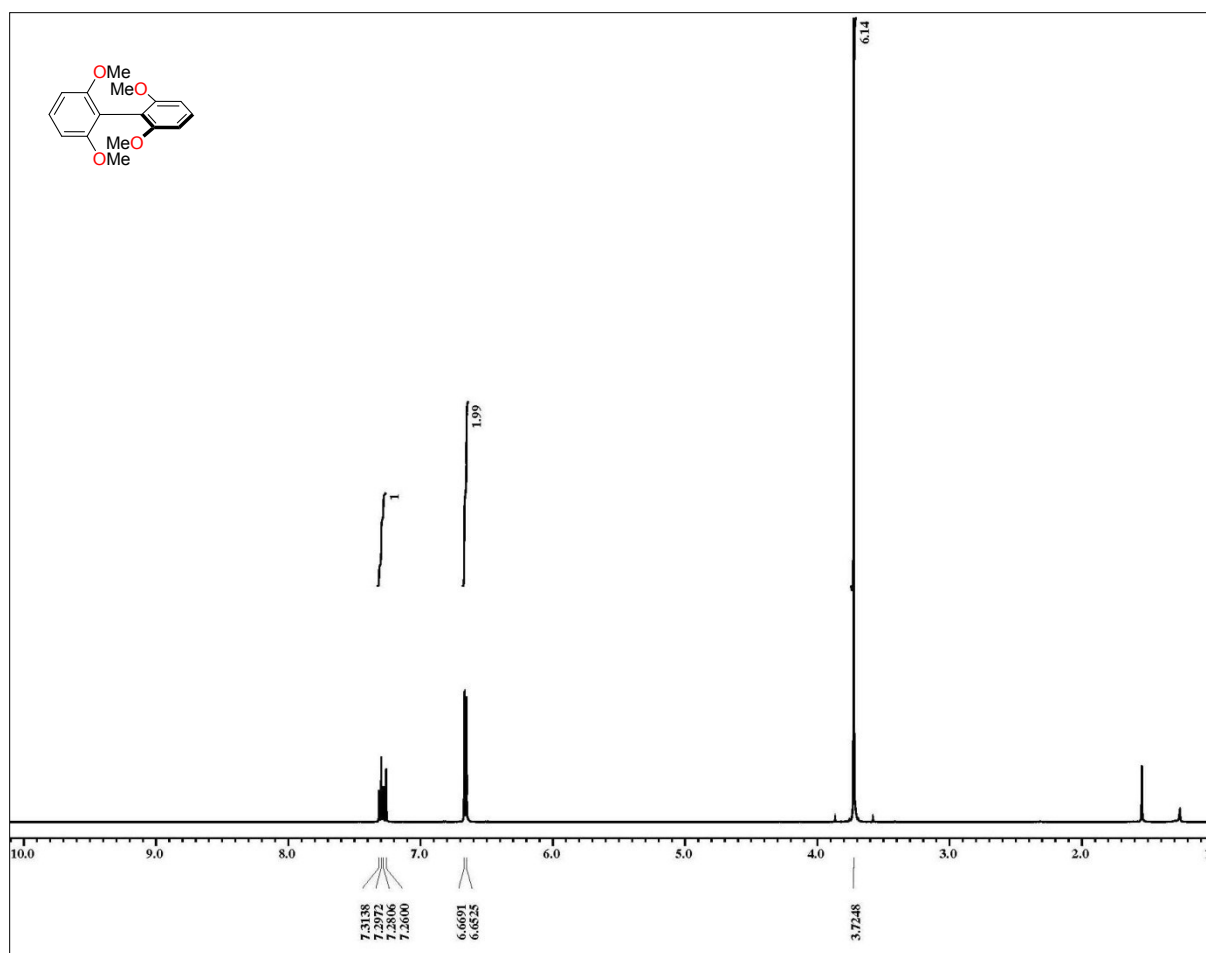

**Figure S15.**  $^1\text{H}$  NMR spectrum (500 MHz) of 2,2',6,6'-tetramethoxy-1,1'-biphenyl in  $\text{CDCl}_3$ .

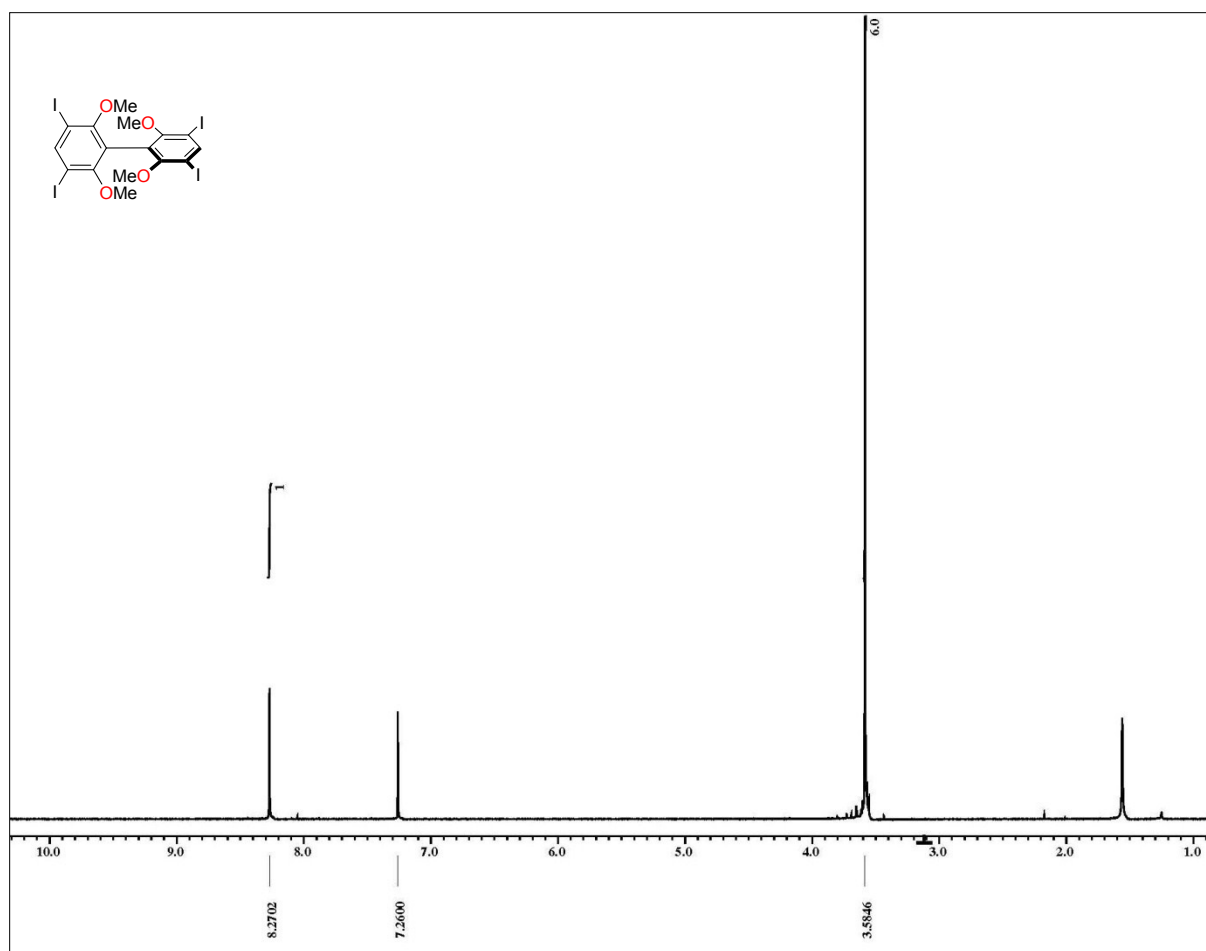

**Figure S16.** <sup>1</sup>H NMR spectrum (500 MHz) of 3,3',5,5'-tetraiodo-2,2',6,6'-tetramethoxy-1,1'-biphenyl in CDCl<sub>3</sub>.

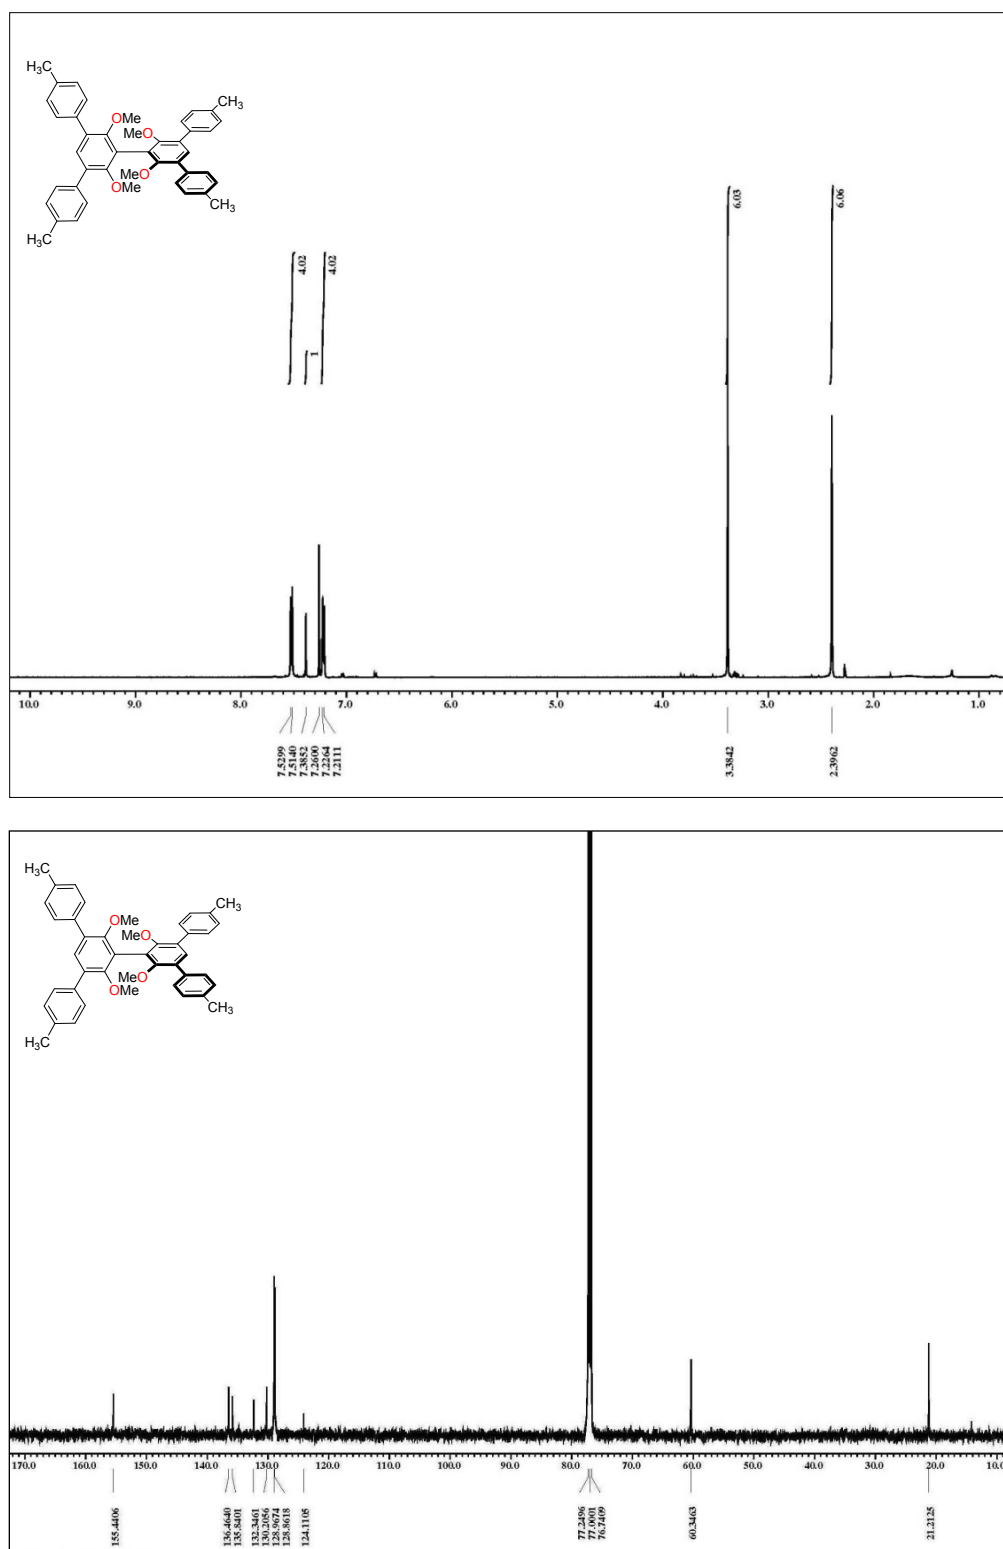

**Figure 17.** <sup>1</sup>H (500 MHz) and <sup>13</sup>C NMR (125 MHz) spectra of 3,3',5,5'-tetrakis(*p*-methylphenyl)-2,2',6,6'-tetramethoxy-1,1'-biphenyl in CDCl<sub>3</sub>.

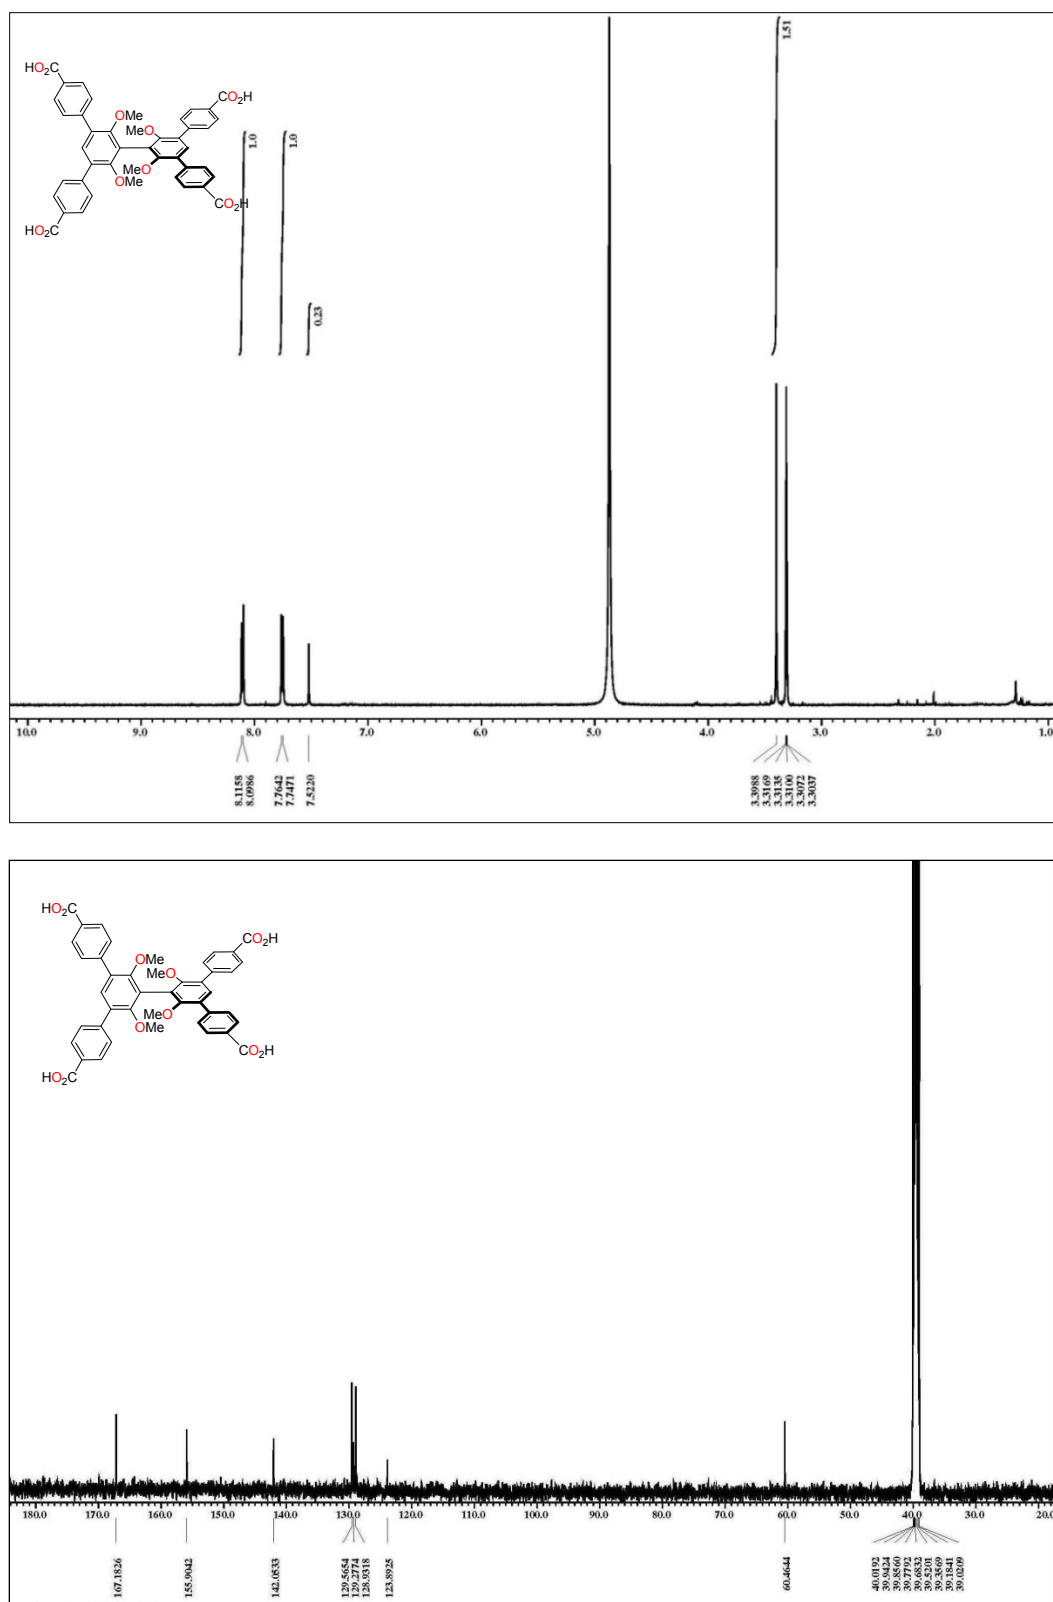

**Figure 18.** <sup>1</sup>H (500 MHz) and <sup>13</sup>C (125 MHz) NMR spectra of 3,3',5,5'-tetrakis(*p*-carboxyphenyl)-2,2',6,6'-tetramethoxy-1,1'-biphenyl in CD<sub>3</sub>OD and DMSO-*d*<sub>6</sub>, respectively.
